# Supplementary material for: Genetic screens in isogenic mammalian cell lines without single cell cloning
Source: PubMed Central journal article supplement (PMC7005275; doi:10.1038/s41467-020-14620-6), 2020-02-06
Supplement: 41467_2020_14620_MOESM3_ESM.pdf [file 41467_2020_14620_MOESM3_ESM.pdf]

**Title:** Supplementary Dataset 1

**Description:** Read counts of all screens in this study.

**Title:** Supplementary Dataset 2

**Description:** Gene-level analysis of all screens using the Brunello library.

**Title:** Supplementary Dataset 3

**Description:** Gene-level analysis of all screens using the Gattinara library.

**Title:** Supplementary Dataset 4

**Description:** Gene-level analysis of all screens using the secondary library.

**Title:** Supplementary Dataset 5

**Description:** Collation of gene sets used in this study
